# Supplementary material for: IL-15 Prevents the Development of T-ALL from Aberrant Thymocytes with Impaired DNA Repair Functions and Increased NOTCH1 Activation
Source: MDPI journal article supplement (doi:10.3390/cancers15030671), 2023-01-21
Supplement: s1 [file s1]

**Supplementary Table S1.** Antibodies used in this study

| Marker         | Fluorochrome | Catalog # | Source         | Clone ID |
|----------------|--------------|-----------|----------------|----------|
| CD4            | APC CY5.5    | MCD0419   | Invitrogen     | GK1.5    |
| CD8a           | eFluor450    | 48008182  | ebiosciences   | 53-6.7   |
| TCRb           | PE/Dazzle594 | 109240    | Biolegend      | H57-597  |
| CD3            | PE-Cy5       | 15003182  | eBiosciences   | 145-2C11 |
| CD44           | PE-Cy7       | 103030    | Biolegend      | IM7      |
| CD25           | FITC         | 101908    | Biolegend      | 3C7      |
| CD117          | APC          | 5015056   | ebiosciences   | ACK2     |
| CD27           | PE           | 124210    | Biolegend      | LG.3A10  |
| CXCR4          | BV711        | 146517    | Biolegend      | L276F12  |
| CD24           | BV510        | 101831    | Biolegend      | M1/69    |
| b-actin        |              | CS4970    | Cell Signaling |          |
| AKT            |              | CS9272    | Cell Signaling |          |
| p-AKT (Ser473) |              | CS9271    | Cell Signaling |          |
| ICN1           |              | NEB4147   | Cell Signaling |          |
| HES1           |              | 11988S    | Cell Signaling |          |

**Supplementary Table S2.** RT-qPCR primers used in this study

| Gene Name      | Gene ID                     | Sense primer            | Anti-sense primer       | Amplicon size (bp) |
|----------------|-----------------------------|-------------------------|-------------------------|--------------------|
| <i>Rplp0</i> * | NM_007475.5                 | TCTGGAGGGTGTCCGCAA      | CTTGACCTTTTCAGTAAGG     | 154                |
| <i>Actb</i>    | <a href="#">NM_007393.5</a> | ACCTTCTACAATGAGCTGCG    | CTGGATGGCTACGTACATGG    | 147                |
| <i>Myc</i>     | NM_001177353.1              | GCTGTTTGAAGGCTGGATTTTC  | GATGAAATAGGGCTGTACGGAG  | 126                |
| <i>Cd4</i>     | <a href="#">NM_013488.3</a> | GTTCGGCATGACACTCTCAG    | CCTTCTCTGCCTTCCACATC    | 146                |
| <i>Tox</i>     | NM_145711                   | TGCTCTCCAATTCCATCTCTG   | CTGTCTGATGTCTGTAGGCTG   | 119                |
| <i>Notch1</i>  | <a href="#">NM_145611.4</a> | GATGAGTGTGCTCTGGGTG     | TTCTGACATGGGTGGAGATG    | 149                |
| <i>Lyl1</i>    | NM_008535                   | CCCTTCAGCATCTTCCCTAAC   | TCACGGCTGTTGGTGAAC      | 119                |
| <i>Hoxa13</i>  | NM_008264                   | CCAAATGTACTGCCCAAAG     | GTTCTTTCAACTGCACCTTAGTG | 149                |
| <i>Tal1</i>    | NM_011527                   | TGCCTTCCCCATGTTTAC      | GCCCCATTACATTCTGCT      | 150                |
| <i>Tal2</i>    | NM_009317                   | TTCACAAATACCAGGGAGCG    | TGGAGGGTGAGTAGGGATAAG   | 87                 |
| <i>Lmo1</i>    | NM_057173                   | CTCTACACCAAGGCCAACC     | CCGCATCACCATCTCAAAAG    | 117                |
| <i>Lmo2</i>    | NM_008505                   | ACGGAATTTGTGCAGGAGAG    | CGCATTTGAAACACTCCAGG    | 140                |
| <i>Gimap1</i>  | NM_008376.3                 | GGGACTGTCAGCAAGAAAGCTGC | CGGGGCCCTGGAGTCCTCTG    | 140                |
| <i>Gimap3</i>  | NM_031247.3                 | TTACAGTGTGCACCAGGAAG    | CTGAATGCAACACCTCCAAC    | 149                |
| <i>Gimap4</i>  | NM_001243199.1              | GGGTGAGCACCTGGGATGGGA   | GCCCTGGAGAGGTCAGGGCA    | 126                |
| <i>Gimap5</i>  | NM_175035.5                 | AGGACATCGGAGACTGCTAC    | CATGACCCCTACCCCAAAG     | 137                |

\**Rplp0* (36B4)

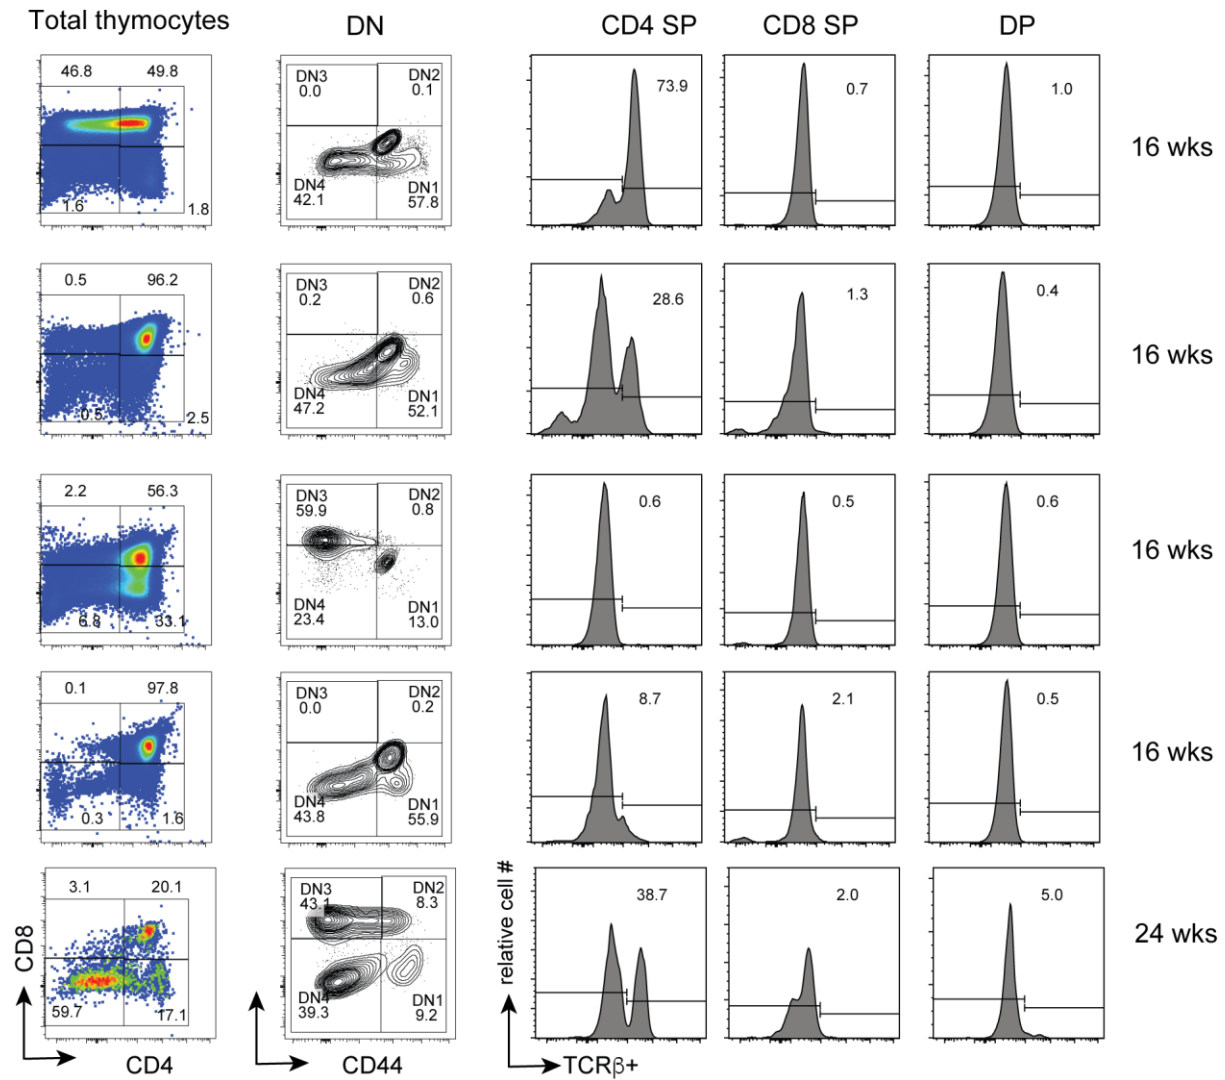

**Supplementary Figure S1.** Flow cytometry profiles of thymocytes from additional leukemic NOD.Scid.II15<sup>-/-</sup> mice. Profile of thymocyte subsets based on CD4 and CD8 expression (first column) and the DN subsets based CD25 and CD44 expression (second column). Histograms (last 3 columns) show TCRβ expression in CD4 SP, CD8 SP and DP subsets.

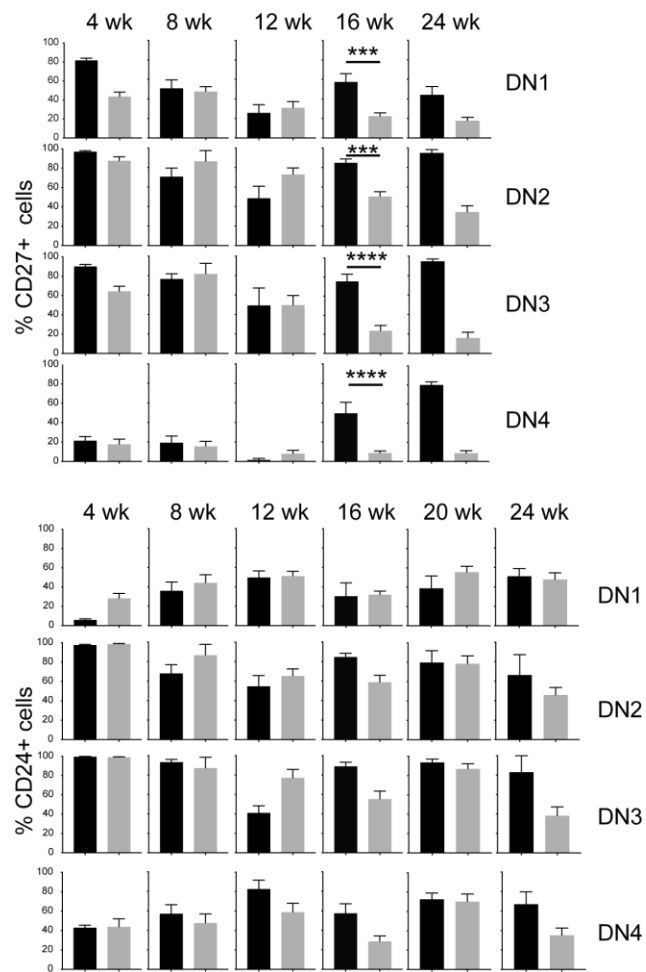

**Supplementary Figure S2.** Reduced expression of CD27 in mature DN thymocytes of IL-15 deficient NOD.*Scid* mice. Proportion of CD27<sup>+</sup> (A) and CD24<sup>+</sup> cells (B) in DN1, DN2, DN3 and DN4 subsets in NOD.*Scid* (Black bars) and NOD.*Scid*.*Il15*<sup>-/-</sup> (grey bars) mice. n=4-8 mice per group. Statistical significance was calculated using Mann-Whitney's test. \*\*\*  $p > 0.001$ , \*\*\*\*  $p > 0.0001$ .

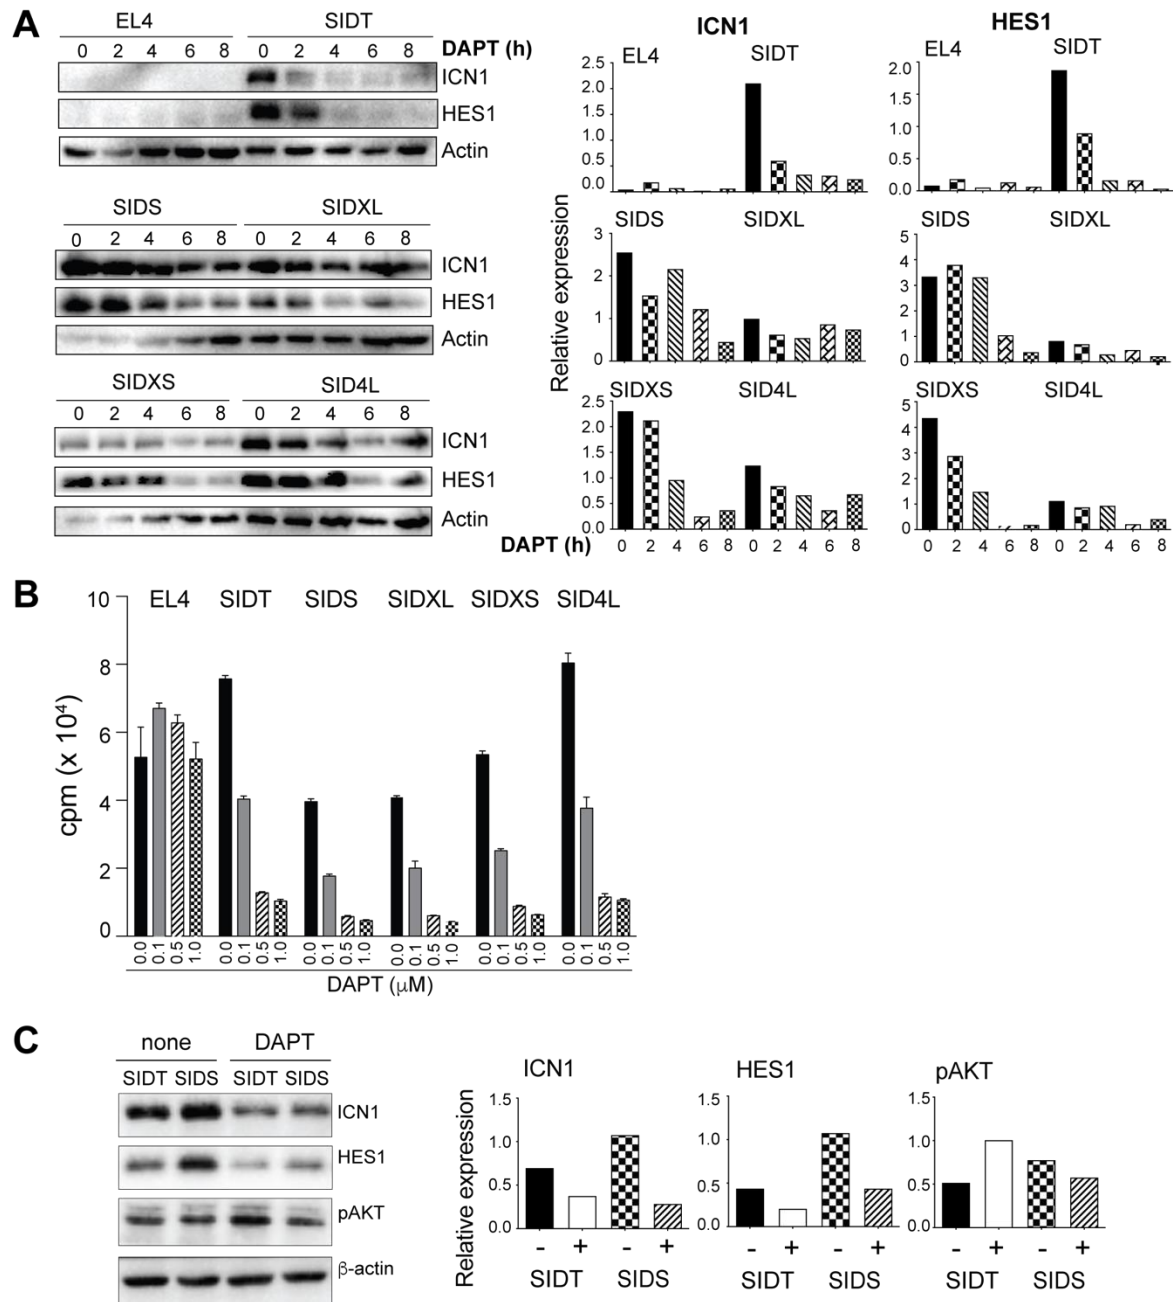

**Supplementary Figure S3.** Increased NOTCH1 activation in cell lines established from *NOD.Scid.II15<sup>-/-</sup>* mice. (A) Indicated cell lines and EL4 controls were grown in culture in the presence of the gamma secretase inhibitor DAPT for the indicated periods of time and analyzed for the expression of ICN1 and HES1. Representative data from one of the two similar experiments are shown. Densitometry quantification of ICN1 and HES1 bands normalized to the corresponding actin band for each sample is graphically represented on the right side. (B) Inhibition of cell proliferation in T-ALL cell lines by DAPT in T-ALL cell lines.  $2 \times 10^3$  cells were seeded in 96 well plates incubated with the indicated concentration of DAPT for 32 h before adding 1  $\mu$ Ci of methyl-[ $^3$ H] thymidine for an additional 8 h. (C) NOTCH1 inhibition does not affect pAKT activation in leukemic cell lines. Indicated T-ALL cell lines were incubated with DAPT for 24 h *in vitro* and lysed to assess the expression of ICN1, HES1 and pAKT. Representative data from one of the two similar experiments are shown. Densitometry quantification of ICN1, HES1 and pAKT bands normalized to the corresponding actin band for each sample is graphically represented on the right side.

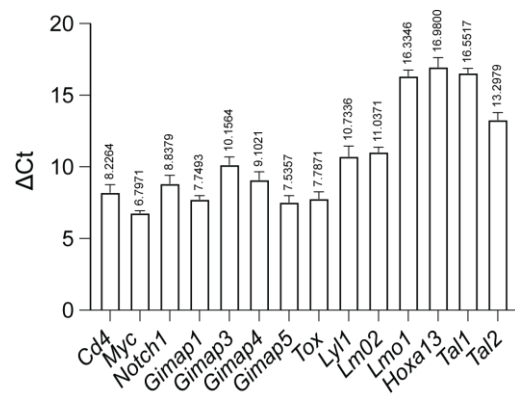

**Supplementary Figure S4.** Expression of leukemia-associated genes in primary leukemic cells isolated from NOD.*Scid.II15*<sup>-/-</sup> mice. RNA samples extracted from total lymph node cells of 12 leukemic NOD.*Scid.II15*<sup>-/-</sup> mice were evaluated individually for the expression of the indicated genes and the housekeeping gene *Rplp0* (*36b4*). The mean raw cycle threshold (Ct) values for the genes of interest were normalized by subtracting the mean Ct value of the reference gene *Rplp0* (Ct= 17.1) to obtain the mean  $\Delta C_t$  for each gene of interest, which is indicated above the histogram.

**Figure 5A**

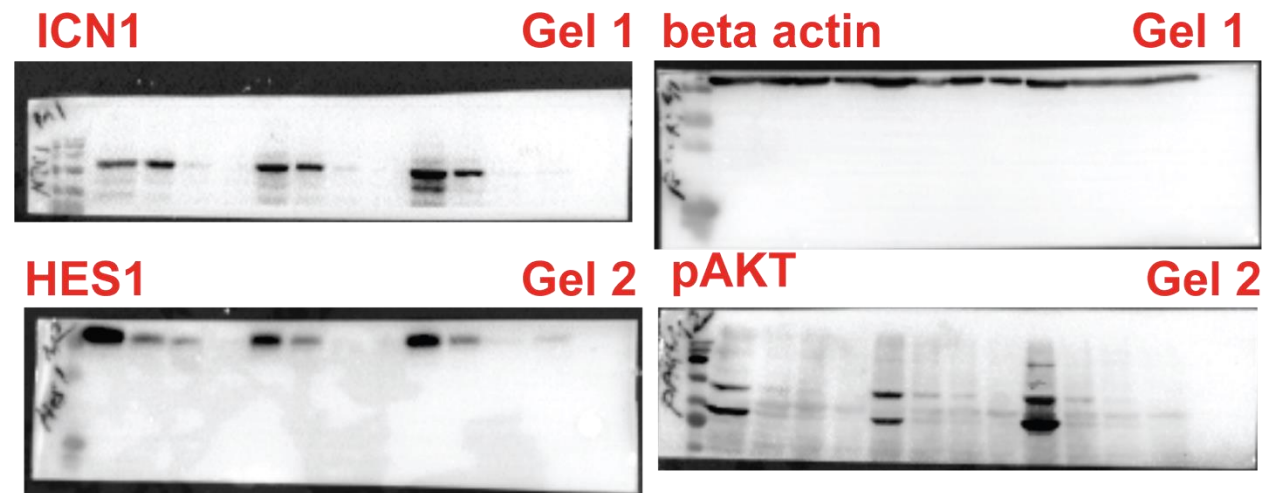

**Supplementary Figure S5A.** Original western blots used in Figure 5A

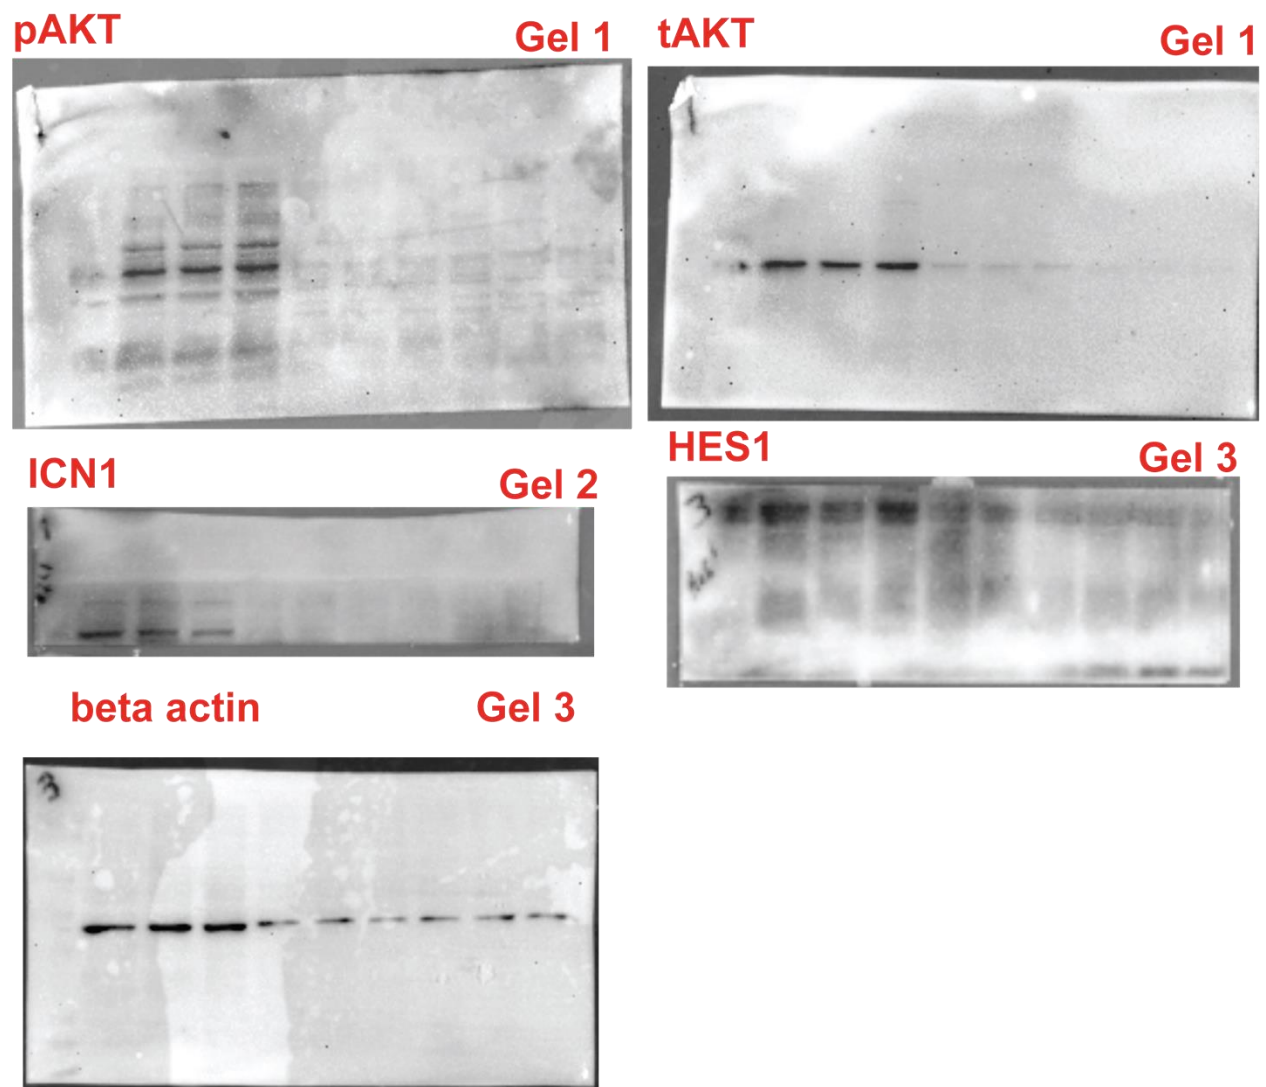

**Supplementary Figure S5B.** Original western blots used in Figure 5B

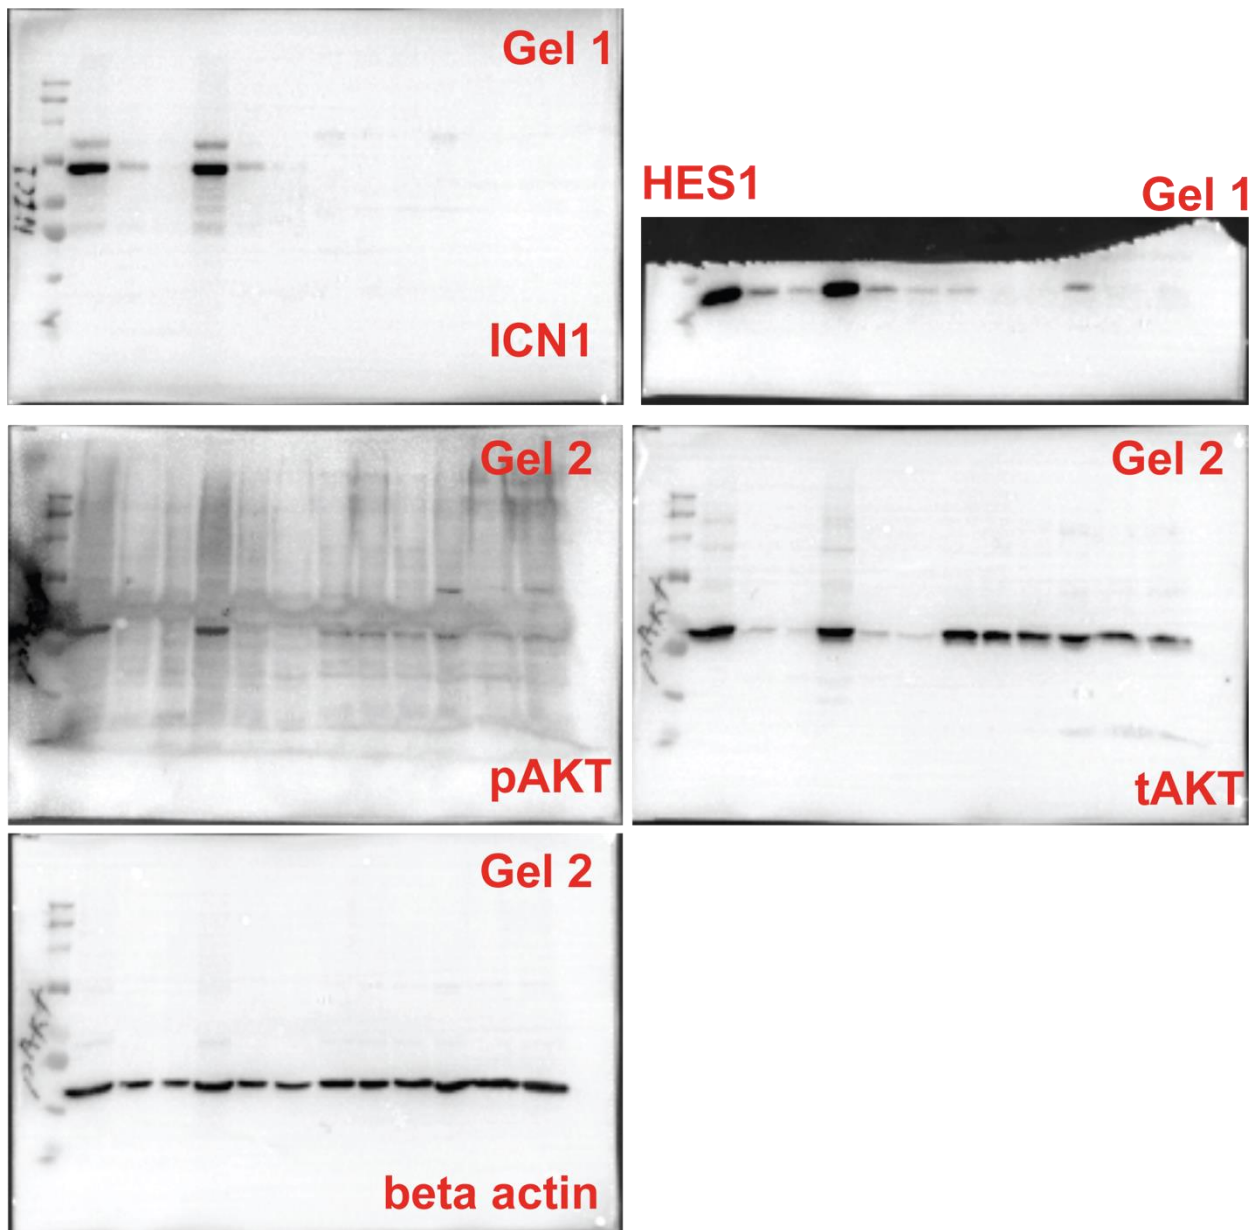

Supplementary Figure S6. Original western blots used in Figure 6.
